# Supplementary material
Source: PubMed Central journal article supplement (PMC7965802)
Supplement: 3735_tables.pdf [file 3735_tables.pdf]

**On-line Table 1: Dentate nuclei volume, mean diffusivity, and fractional anisotropy of the dentate nuclei, superior cerebellar peduncles, and cerebellar white matter in the acute, subacute, and chronic periods**

|                                                         | Acute Period (Mean)        | Subacute Period (Mean)       | Chronic Period (Mean)      | Comparison P Value                                       |
|---------------------------------------------------------|----------------------------|------------------------------|----------------------------|----------------------------------------------------------|
| Volume (mm <sup>3</sup> )                               |                            |                              |                            |                                                          |
| Dentate nuclei                                          | 554.9 ± 269                | 526.7 ± 322                  | 389.3 ± 176                | .007 <sup>a</sup>                                        |
| Mean diffusivity (×10 <sup>-6</sup> mm <sup>2</sup> /s) |                            |                              |                            |                                                          |
| Dentate nuclei                                          | 808.0 ± 228 <sup>b</sup>   | 734.8 ± 202                  | 725.6 ± 173 <sup>b</sup>   | .03 <sup>b</sup>                                         |
| Superior cerebellar peduncles                           | 840.3 ± 147 <sup>b</sup>   | 967.1 ± 144 <sup>b</sup>     | 843.3 ± 130                | .02 <sup>b</sup>                                         |
| Cerebellar white matter                                 | 741.7 ± 63                 | 781.4 ± 27 <sup>c</sup>      | 715.5 ± 42 <sup>c</sup>    | .004 <sup>c</sup>                                        |
| FA                                                      |                            |                              |                            |                                                          |
| Dentate nuclei                                          | 0.243 ± 0.087 <sup>b</sup> | 0.192 ± 0.072 <sup>b,c</sup> | 0.240 ± 0.103 <sup>c</sup> | .01 <sup>b</sup><br>.04 <sup>c</sup>                     |
| Superior cerebellar peduncles                           | 0.549 ± 0.143 <sup>b</sup> | 0.457 ± 0.136 <sup>b,c</sup> | 0.577 ± 0.119 <sup>c</sup> | .04 <sup>b</sup><br>.02 <sup>c</sup><br>.03 <sup>a</sup> |
| Cerebellar white matter                                 | 0.691 ± 0.129              | 0.623 ± 0.133 <sup>c</sup>   | 0.721 ± 0.128 <sup>c</sup> | .056 <sup>c</sup>                                        |

**Note:**—MB indicates medulloblastoma.

<sup>a</sup> Friedman 2-way analysis of variance by rank for related samples.

<sup>b</sup> Wilcoxon signed rank test for related samples between acute and subacute periods or acute and chronic periods.

<sup>c</sup> Wilcoxon signed rank test for related samples between subacute and chronic periods.

**On-line Table 2: Dentate nuclei volume according to various factors**

| Factors                  | Dentate Nuclei Volume (Mean) (mm <sup>3</sup> ) | Comparison P Value |
|--------------------------|-------------------------------------------------|--------------------|
| Tumor types              |                                                 |                    |
| MB (chronic)             | 284.5 ± 149                                     | .009 <sup>a</sup>  |
| Other subtypes (chronic) | 464.1 ± 157                                     |                    |
| PA (acute)               | 502.1 ± 144                                     | .33 <sup>b</sup>   |
| PA (chronic)             | 577.8 ± 327                                     |                    |
| MB (acute)               | 544.8 ± 255                                     | .008 <sup>b</sup>  |
| MB (chronic)             | 284.6 ± 149                                     |                    |
| Treatment                |                                                 |                    |
| RT (chronic)             | 312.1 ± 148                                     | .005 <sup>a</sup>  |
| No RT (chronic)          | 466.5 ± 172                                     |                    |
| Neurologic sequelae      |                                                 |                    |
| Ataxia (chronic)         | 294.0 ± 156                                     | .008 <sup>a</sup>  |
| No ataxia (chronic)      | 484.7 ± 142                                     |                    |
| PFS (chronic)            | 178.6 ± 155                                     | .007 <sup>a</sup>  |
| No PFS (chronic)         | 431.5 ± 149                                     |                    |
| Linear model             |                                                 |                    |
| RT/ataxia                | 220.4 ± 125                                     | .002 <sup>a</sup>  |
| No RT/no ataxia          | 505.4 ± 162                                     |                    |

**Note:**—PA indicates pilocytic astrocytoma; RT, radiation therapy; MB, medulloblastoma.

<sup>a</sup> Mann-Whitney *U* test for independent samples.

<sup>b</sup> Wilcoxon signed rank test for related samples.
